# Supplementary material for: Conserved mRNA-granule component Scd6 targets Dhh1 to repress translation initiation and activates Dcp2-mediated mRNA decay in vivo
Source: PubMed Central journal article supplement (PMC6307823; doi:10.1371/journal.pgen.1007806), 2018-12-07
Supplement: pgen.1007806.s006.pdf [file pgen.1007806.s006.pdf]

**A**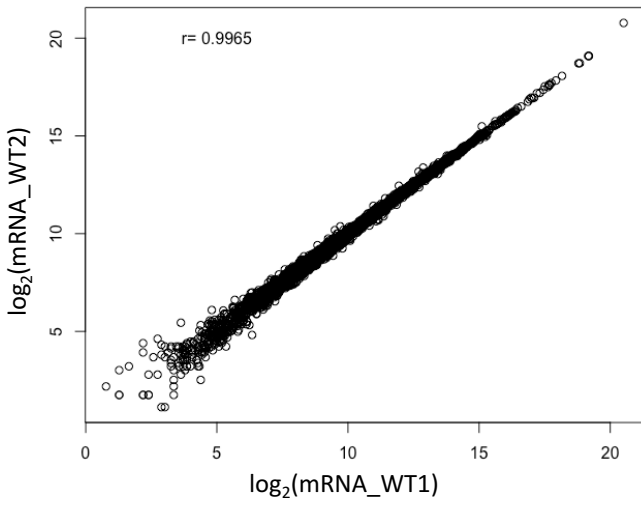**B**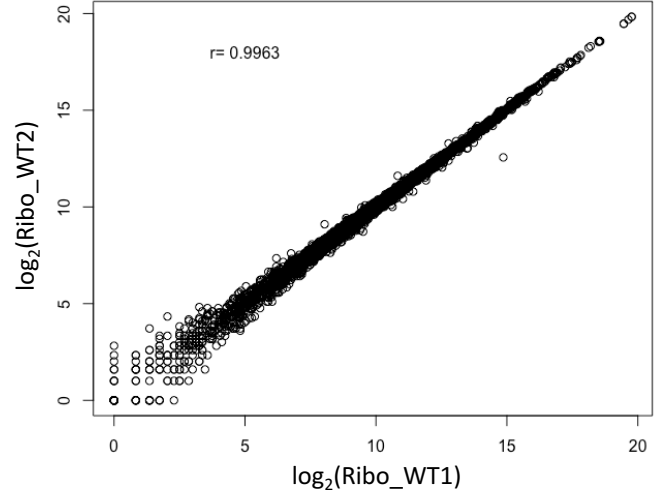**C**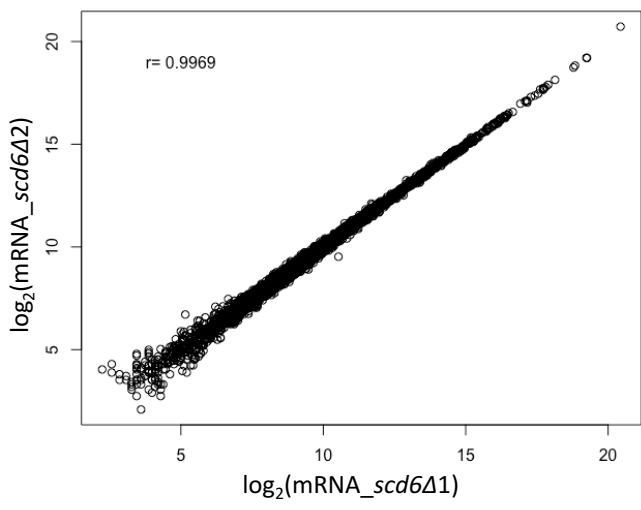**D**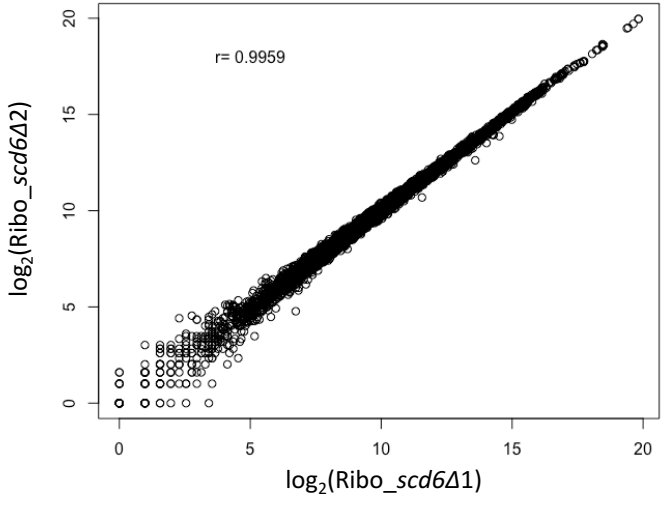**E**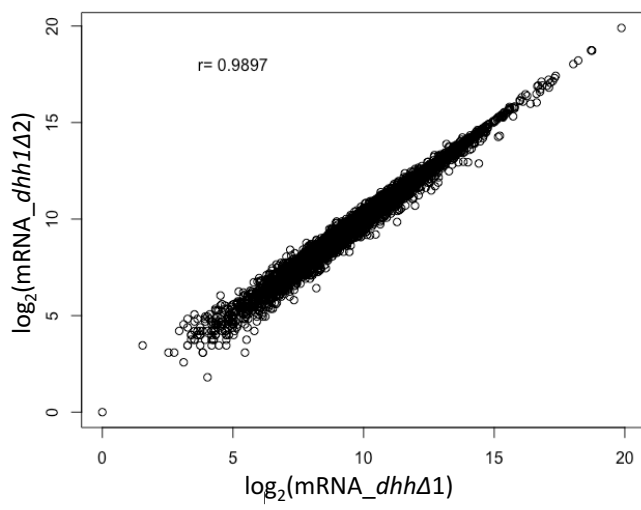**F**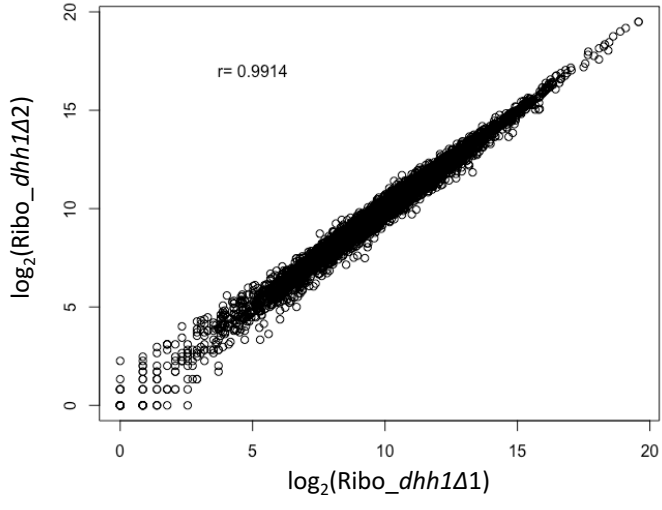**Figure S6**

**G**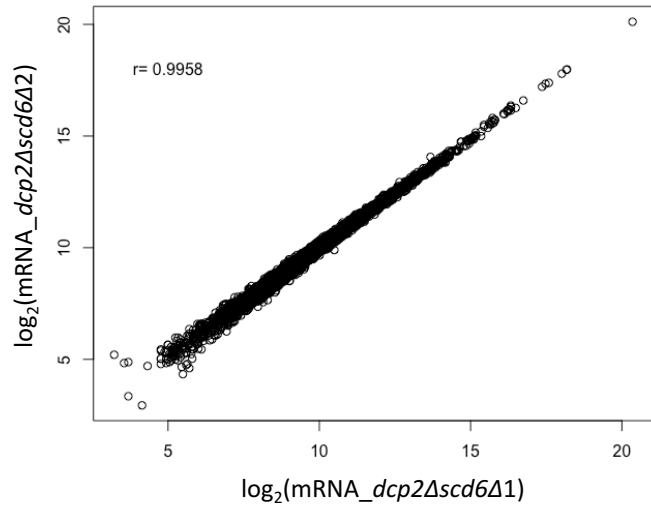**H**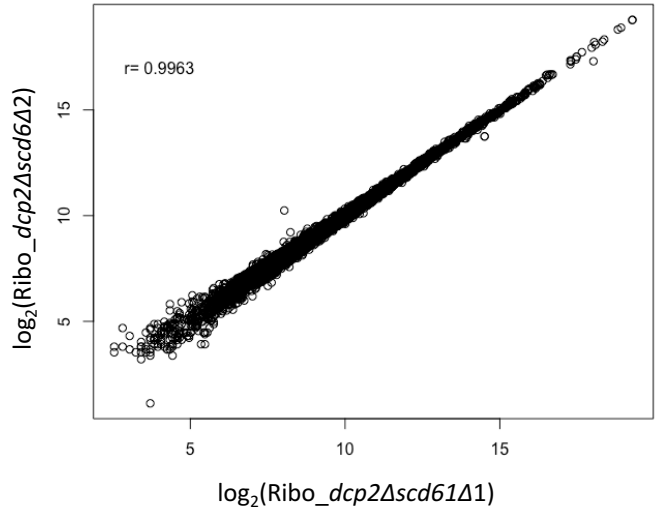**I**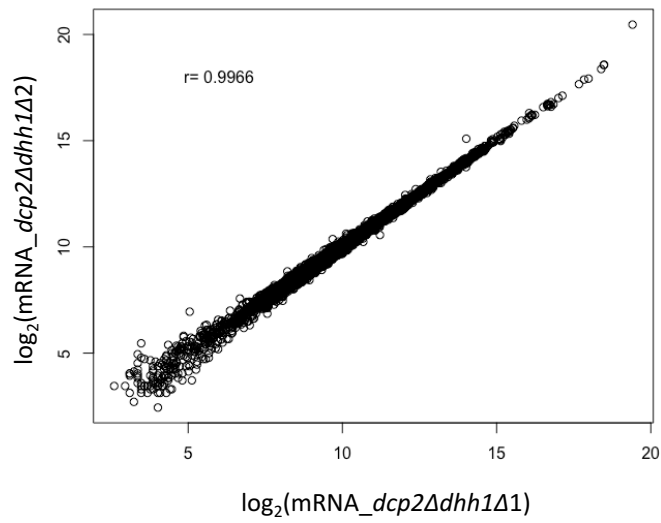**J**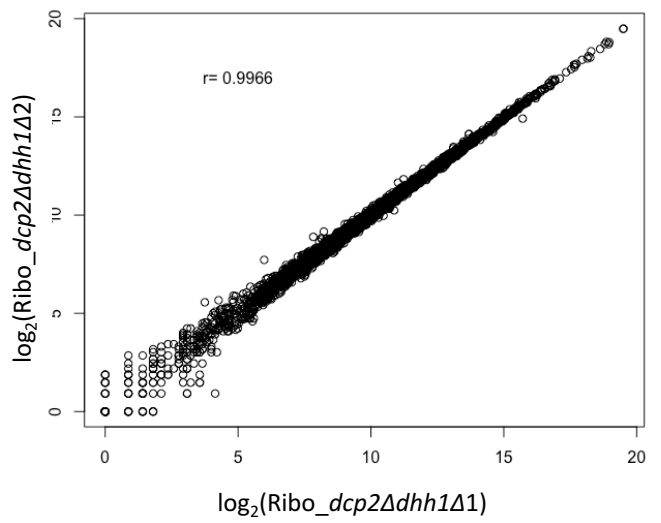**K**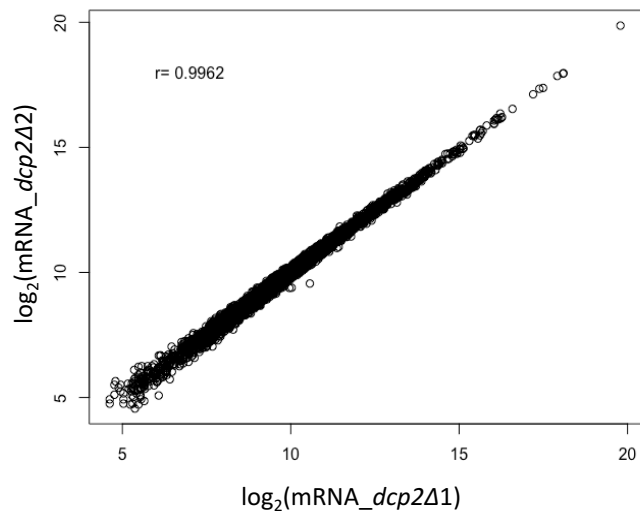**L**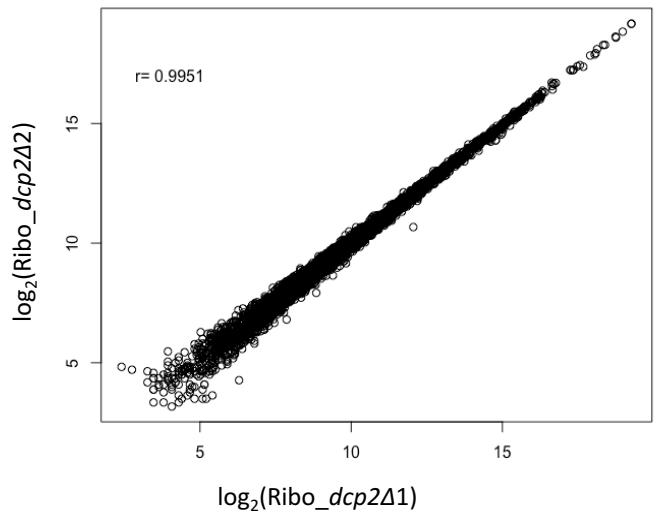**Figure S6 (cont'd)**
